# Supplementary material for: Predicting EQ-5D-5L crosswalk from the PROMIS-29 profile for the United Kingdom, France, and Germany
Source: Research Square preprint supplement (doi:10.21203/rs.3.rs-34792/v3), 2020-11-19
Supplement: Supplementary file 1 [file fca603db035acb4494bf0b24.docx]

**Appendix**

**Table A1.** Sociodemographic characteristics of the samples.

| **Variable** | **Value** | **UK** | **France** | **Germany** | **p-value** |
| --- | --- | --- | --- | --- | --- |
| **Sex** | Male | 49.0% | 48.3% | 48.5% |  |
|  | Female | 51.0% | 51.7% | 51.5% | .918 |
| **Age** | 18-29 | 19.8% | 18.6% | 16.4% |  |
|  | 30-39 | 16.8% | 16.3% | 14.4% |  |
|  | 40-49 | 18.2% | 18.5% | 18.3% |  |
|  | 50-59 | 16.1% | 17.4% | 18.5% |  |
|  | 60-69 | 13.9% | 14.3% | 13.4% |  |
|  | 70 + | 15.2% | 15.1% | 19.0% | .027 |
| **Education** | Low | 8.1% | 7.6% | 23.4% |  |
|  | Medium | 48.6% | 43.2% | 48.2% |  |
|  | High | 43.3% | 49.2% | 28.4% | p < .001 |
| **Occupation** | Managers and professionals | 21.2% | 10.8% | 12.5% |  |
|  | Technicians, clerks, service workers | 25.1% | 22.9% | 28.9% |  |
|  | Workers, elementary occupations, armed forces | 14.3% | 17.8% | 17.1% |  |
|  | Inactive or unemployed | 39.4% | 48.4% | 41.5% | p < .001 |
| **Income** | Lower income | 16.8% | 12.8% | 19.2% |  |
|  | Lower-middle income | 20.2% | 19.5% | 18.0% |  |
|  | Higher-middle income | 30.7% | 27.2% | 21.8% |  |
|  | Higher income | 21.0% | 24.4% | 24.2% |  |
|  | Prefer not to answer | 11.3% | 16.2% | 16.8% | p < .001 |

UK: United Kingdom
